# Supplementary material for: Differential moderation effects of ApoE and 5-HTTLPR genotypes on social vulnerability in predicting mortality among community-dwelling middle-aged and older adults: a nationwide population-based study
Source: publisher site journal article supplement (doi:10.18632/aging.203629), 2021-10-14
Supplement: Supplementary file [file aging-v13i19-203629-supplementary-material-SD1.pdf]

## SUPPLEMENTARY MATERIALS

### Supplementary Tables

**Supplementary Table 1. Items aggregated in the social vulnerability index from SEBAS 2006.**

---

|                         |
|-------------------------|
| <b>Living situation</b> |
| 1. Marital status       |
| 2. Living alone         |
| 3. Neighborhood         |

---

|                                                    |
|----------------------------------------------------|
| <b>Social support</b>                              |
| 4. Felt lonely                                     |
| 5. People weren't nice to you                      |
| 6. Argument/disagreement with anyone in last 24 hr |
| 7. See your residence/community as safe            |

---

|                                                     |
|-----------------------------------------------------|
| <b>Socially oriented activities of daily living</b> |
| 8. Telephone use                                    |
| 9. Get to places out of walking distance            |

---

|                                                             |
|-------------------------------------------------------------|
| <b>Leisure activities</b>                                   |
| 10. Play chess or cards with others                         |
| 11. Chat with relatives/friends, drink tea socially         |
| 12. Jog, climb mountains, do outdoor activities with others |
| 13. Group activities: singing, dancing, tai chi             |
| 14. Number of participating groups                          |

---

|                                                               |
|---------------------------------------------------------------|
| <b>Empowerment, life control</b>                              |
| 15. Do those close to you make too many demands on you?       |
| 16. Felt joyful                                               |
| 17. Felt life going well                                      |
| 18. Agree that usually more good things than bad will happen  |
| 19. Little control over things that happen to you             |
| 20. What happens in future depends mostly on yourself         |
| 21. Really no way you can solve some of your problems         |
| 22. Little you can do to change important things in your life |
| 23. Can do just about anything i set my mind to               |
| 24. Often feel helpless in dealing with problems of life      |
| 25. Sometimes feel pushed around in life                      |
| 26. Anything else happen in last 24 hrs that was stressful    |

---

|                                            |
|--------------------------------------------|
| <b>Major life events and trauma events</b> |
| 27. Major life events (number)             |
| 28. Trauma events (number)                 |

---

|                                                      |
|------------------------------------------------------|
| <b>Socio-economic status</b>                         |
| 29. Are you satisfied with current living situation? |
| 30. Any difficulty meeting living expenses           |
| 31. Self-reported socio-economic status              |
| 32. Education level                                  |

---

**Supplementary Table 2. Cox proportional hazard ratio of social vulnerability index (SVI) and all-cause mortality adjusted by age, sex and different genotypes, stratified by age  $\geq 65$  yrs and  $< 65$  yrs.**

| Variables       | Age $< 65$ yrs <sup>a</sup><br>(N = 501) |                | Age $\geq 65$ yrs <sup>a</sup><br>(N = 484) |               |
|-----------------|------------------------------------------|----------------|---------------------------------------------|---------------|
|                 | HR                                       | 95% CI         | HR                                          | 95% CI        |
| SVI             | 1.20                                     | (1.01–1.42)*   | 1.07                                        | (0.97–1.18)   |
| Age             | 1.15                                     | (0.98–1.34)    | 1.07                                        | (1.02–1.13)** |
| Sex             | 0.35                                     | (0.12–1.07)    | 0.51                                        | (0.29–0.90)*  |
| Education level | 1.07                                     | (0.36–3.24)    | 0.85                                        | (0.47–1.53)   |
| Multimorbidity  | 0.78                                     | (0.28–2.17)    | 0.92                                        | (0.49–1.73)   |
| SPMSQ           | 1.92                                     | (1.39–2.66)*** | 1.12                                        | (0.93–1.35)   |
| ADL             | 0.82                                     | (0.54–1.24)    | 0.97                                        | (0.81–1.19)   |
| 5-HTTLPR        | 1.00                                     | (0.29–3.44)    | 1.32                                        | (0.60–2.90)   |
| APOE            | 1.04                                     | (0.23–4.66)    | 0.59                                        | (0.25–1.36)   |

\* $p < 0.05$ ; \*\* $p < 0.01$ ; \*\*\* $p < 0.001$ . <sup>a</sup>Adjusted for age, sex, education level ( $> 6$  years), multimorbidity ( $\geq 2$  chronic conditions), SPMSQ, ADL, APOE and 5-HTTLPR genotypes.

**Supplementary Table 3. Tests of interaction terms.**

| Social vulnerability index#ApoE <sup>a</sup> | LR test <sup>b</sup> | p-Value |
|----------------------------------------------|----------------------|---------|
| $< 65$ years old                             | 0.29                 | 0.59    |
| $\geq 65$ years old                          | 5.16                 | 0.02    |

<sup>a</sup>Likelihood ratio test for interaction. <sup>b</sup>Adjusted for age and sex.

**Supplementary Table 4. Strata-specific hazard ratios based on ApoE genotype in older adults ( $\geq 65$  years old).**

| APOE genotype    | HR <sup>c</sup> | (95% CI)  |
|------------------|-----------------|-----------|
| e2e2, e3e2, e3e3 | 1.12**          | 1.03–1.22 |
| e4e3, e4e4       | 0.78            | 0.57–1.07 |

\* $p < 0.05$ ; \*\* $p < 0.01$ ; \*\*\* $p < 0.001$ . <sup>c</sup>Adjusted for age and sex.
